# Supplementary material for: Germline and Somatic NF1 Alterations Are Linked to Increased HER2 Expression in Breast Cancer
Source: Oxford University Press journal article supplement (doi:10.1158/1940-6207.capr-18-0072), 2018-08-13
Supplement: 19406207capr180072-sup-197937_2_supp_4938053_pcww3q.xlsx [file 19406207capr180072-sup-197937_2_supp_4938053_pcww3q.xlsx]

## Sheet: Table1_mRNA
Supplement 3. Table 1. RNAseq based mRNA expression of selected genes in The Cancer Genome Atlas (TCGA) breast invasive carcinoma dataset
	NF1 not mutated/deleted			NF1 mutated/deleted			Mann-Whitney U
Gene	n	median	range	n	median	range	W	P value
HER2	643	7765.48	468–226650	317	4746.58	155–337915	133991	2.03978e-15
HER2, not amplified by FISH	219	8020.81	2247–117929	72	4763	599–17145	12335	6.72648e-13
HER2, amplified by FISH	46	14067.3	2236–186768	30	61107.3	2077–217078	428	0.00497866
HER2, no gain/amplification by seq	411	6725.38	468–25338	243	4162.33	155–17145	77208	1.61084e-31
HER2, gain/amplification by seq	232	10949.6	1606–226650	74	56310.8	4188–337915	3932	2.23996e-12
HER2, not amplified by seq	411	6725.38	468–25338	243	4162.33	155–17145	77208	1.61084e-31
HER2, amplified by seq	62	52087.7	3611–226650	57	85795.9	9880–337915	1419	0.0645288
	NF1 not mutated/deleted			NF1 mutated/deleted			Mann-Whitney U
Gene	n	median	range	n	median	range	W	P value	P value, Bonferroni corrected
AKT1	643	4019.13	903–10578	317	4720.76	1098–19257	81736	5.89833e-07	1.0617e-05
AKT2	643	2520.61	834–20163	317	2504.43	687–13565	102553	0.874721	15.745
AKT3	643	419.182	12–9660	317	458.948	50–8549	96517	0.181529	3.26752
CCND2	643	626.043	29–39560	317	638.785	56–26081	98103	0.34542	6.21756
CDK4	643	2143.05	987–10845	317	2493.64	1096–38923	71649	6.82696e-14	1.22885e-12
DYRK2	643	656.831	127–5653	317	796.82	176–11479	74851	2.10387e-11	3.78696e-10
KRAS	643	1230.1	287–10154	317	1342.43	226–11061	91459	0.00965431	0.173778
MAP2K1	643	978.888	348–4780	317	1035.77	312–4776	91415	0.00935335	0.16836
MAPK1	643	2964.45	742–10522	317	3071.94	625–8430	100123	0.657376	11.8328
MAPK3	643	1676.99	320–5699	317	1482.05	450–5289	122941	1.95138e-07	3.51248e-06
MDM2	643	2068.33	447–50339	317	1755.71	602–28244	123920	5.14505e-08	9.26109e-07
MTOR	643	1607.31	487–5456	317	1587.72	484–3866	103578	0.680807	12.2545
PAK1	643	1458.07	182–125454	317	1412.82	188–18097	103901	0.623208	11.2177
PTEN	643	2007.82	134–7526	317	1925.05	215–4629	108178	0.121163	2.18093
RUVBL1	643	1157.01	393–5812	317	1191.02	317–4142	98187	0.356153	6.41076
TP53	643	1573.72	194–6264	317	1673.16	199–6179	97296	0.252934	4.55282
TRIB1	643	1886.39	312–20550	317	1812.75	389–15417	108998	0.0796243	1.43324
YEATS4	643	371.561	66–6602	317	350.324	84–4004	110026	0.0447297	0.805135

## Sheet: Table2_protein
Supplement 3. Table 2. Protein expression from The Cancer Proteome Atlas project for the TCGA breast invasive carcinoma samples
	NF1 not mutated/deleted			NF1 mutated/deleted			Mann-Whitney U
Protein	n	median	range	n	median	range	W	P value
HER2	496	-0.12565	-1,76–4,09	242	-0.42585	-1,68–3,88	72352.5	5.69881e-06
HER2, not amplified by FISH	172	-0.11885	-1,59–2,98	56	-0.4992	-1,59–0,31	7053.5	1.81138e-07
HER2, amplified by FISH	33	0.2411	-0,87–4,09	24	1.4252	-1,02–3,2	269	0.0402182
HER2, no gain/amplification by seq	312	-0.23785	-1,76–1,39	185	-0.5958	-1,68–1,82	40242	1.92637e-13
HER2, gain/amplification by seq	184	0.1516	-1,31–4,09	57	1.8133	-1,02–3,88	2361.5	3.69058e-10
HER2, not amplified by seq	312	-0.23785	-1,76–1,39	185	-0.5958	-1,68–1,82	40242	1.92637e-13
HER2, amplified by seq	49	1.6428	-0,87–4,09	48	1.9662	-1,02–3,88	978.5	0.155191
	NF1 not mutated/deleted			NF1 mutated/deleted			Mann-Whitney U
Protein	n	median	range	n	median	range	W	P value	P value, Bonferroni corrected
AKT	512	0.0547555	-2,07–1,29	258	0.15541	-2,44–1,71	57815	0.00471542	0.0424387
AKT_pS473	512	-0.292435	-1,64–3,41	258	-0.22634	-1,73–2,99	63081	0.30855	2.77695
AKT_pT308	512	-0.358655	-1,56–3,12	258	-0.318165	-1,6–2,63	61863.5	0.15095	1.35855
MEK1_pS217S221	512	0.171555	-0,8–2,57	258	0.14139	-0,79–1,64	69736	0.2056	1.8504
ERK2	512	-0.204625	-2,09–0,74	258	-0.241265	-2,83–0,57	69380	0.252807	2.27526
MAPK_pT202Y204	512	0.679775	-1,24–2,99	258	0.563715	-1,12–2,35	73576	0.00977008	0.0879307
PTEN	512	0.15866	-1,97–1,46	258	0.16804	-2,63–1,18	65514	0.854698	7.69228
P53	512	-0.140965	-2,2–1,53	258	0.00193064	-1,97–1,96	49793.5	2.41504e-08	2.17353e-07
MTOR	512	-0.07864	-1,34–0,77	258	-0.163735	-1,41–0,46	76467.5	0.000348374	0.00313537

## Sheet: Table3_CNV
Supplement 3. Table 3. Copy number alterations in The Cancer Genome Atlas breast invasive carcinoma dataset. Number of tumors in each category is shown.
	NF1 not mutated/deleted					NF1 mutated/deleted					Mann-Whitney U for trend
Gene	Deep loss	Shallow loss	Diploid	Low-level gain	High-level amplification	Deep loss	Shallow loss	Diploid	Low-level gain	High-level amplification	W	P value	P value, Bonferroni corrected
AKT1	3	147	405	81	7	0	116	131	62	8	106742	0.182242	3.28036
AKT2	0	78	428	127	10	2	73	152	80	10	104660	0.437611	7.87699
AKT3	0	18	162	377	86	2	10	63	198	44	98141	0.287016	5.16629
CCND2	7	79	427	124	6	0	54	159	84	20	92599.5	0.00816142	0.146906
CDK4	0	48	461	128	6	0	69	177	62	9	111594	0.0041105	0.0739891
DYRK2	0	40	453	138	12	0	58	181	68	10	109848	0.0190268	0.342483
KRAS	4	59	435	138	7	0	42	171	90	14	94475.5	0.0316009	0.568817
MAP2K1	1	156	420	62	4	0	132	142	40	3	115046	0.000215011	0.0038702
MAPK1	0	241	331	65	6	1	163	107	44	2	112816	0.00304636	0.0548345
MAPK3	0	29	259	326	29	0	44	126	133	14	114440	0.000646279	0.011633
MDM2	0	41	449	137	16	0	54	181	68	14	107800	0.0831626	1.49693
MTOR	1	231	390	18	3	3	154	126	33	1	110622	0.0146969	0.264543
PAK1	2	133	361	92	55	0	76	150	69	22	100361	0.67356	12.1241
PTEN	27	132	433	47	4	22	110	154	30	1	116371	3.81662e-05	0.000686991
RUVBL1	1	59	460	120	3	0	49	181	82	5	99079	0.398627	7.17529
TP53	10	301	292	39	1	4	276	28	9	0	141114	2.74046e-29	4.93283e-28
TRIB1	0	11	255	268	109	0	16	80	143	78	89560	0.0010549	0.0189882
YEATS4	0	38	448	139	18	0	53	178	70	16	107159	0.123939	2.23091
